# Supplementary material for: Florpyrauxifen-Benzyl Selectivity to Rice
Source: MDPI journal article supplement (doi:10.3390/agriculture11121270), 2021-12-14
Supplement: s1 [file s1]

## Supplementary material

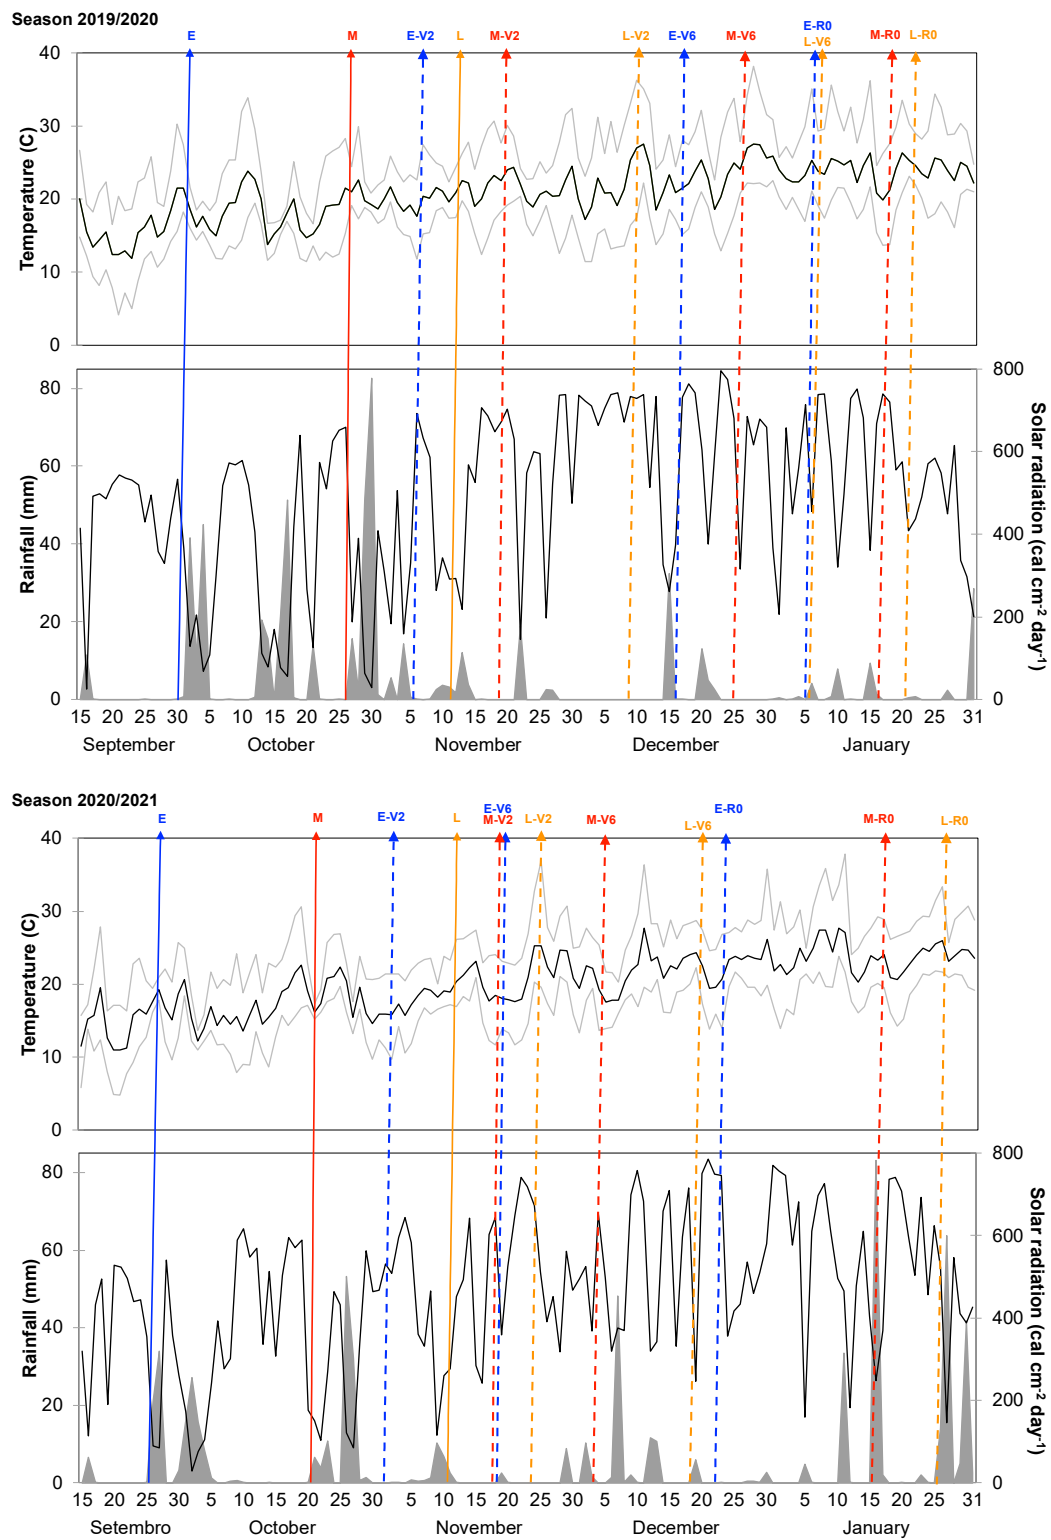

**Figure S1.** Daily mean, maximum and minimum air temperature, rainfall (gray shading), and solar radiation throughout the experiment. The continuous line represents planting date and discontinuous line represents spraying dates. Planting time abbreviations E: Early planting time (blue), M: Medium planting time (red), and L: Late planting time (orange). Spraying time abbreviations V<sub>2</sub>: collar formation on leaf two on the main stem; V<sub>6</sub>: collar formation on leaf six on the main stem, and R<sub>0</sub>: Panicle development has initiated. (Source: Embrapa Clima Temperado weather station <https://www.embrapa.br/clima-temperado> Access on 10 December 2021).

**Table S1.** Temperature regime “Factor B” of growth chamber experiment.

| Temperature Treatment | Initial Growing<br>(until 3 Leaves) <sup>1</sup> | After Application<br>(for 24 hours) <sup>1</sup> | Experimental to the End<br>(28DAA) <sup>1,2</sup> |
|-----------------------|--------------------------------------------------|--------------------------------------------------|---------------------------------------------------|
| T1 (all medium)       | 28/25 °C                                         | 28/25 °C                                         | 28/25 °C                                          |
| T2 (med-low-med)      | 28/25 °C                                         | 18/15 °C                                         | 28/25 °C                                          |
| T3 (high-low-med)     | 38/36 °C                                         | 18/15 °C                                         | 28/25 °C                                          |
| T4 (med-high-high)    | 28/25 °C                                         | 38/36 °C                                         | 38/36 °C                                          |
| T5 (med-high-med)     | 28/25 °C                                         | 38/36 °C                                         | 28/25 °C                                          |
| T6 (med-high-low)     | 28/25 °C                                         | 38/36 °C                                         | 18/15 °C                                          |

<sup>1</sup>Temperature day/night. <sup>2</sup>DAA, days after application.

**Table S2.** Oligonucleotides used in this study for RT-qPCR assay.

| Gene                             | ID                              |         | Oligonucleotide - (5'-3')     | Reference                     |
|----------------------------------|---------------------------------|---------|-------------------------------|-------------------------------|
| <b>Cytochrome P450 CYP71A21</b>  | <i>OsCYP71A21</i>               | Foward  | TGTGACAATGATCTTCTAC-<br>GAGGT | Hirose et al. (2007)<br>[1]   |
|                                  |                                 | Reverse | TCCATCTCTTTGTATGTTTTCCAA      |                               |
| Wall-associated kinase like 21.2 | <i>OsWAKL21.2</i>               | Foward  | GCCACTTTCCCGCTAAGAAGAG        | Malukani et al.<br>(2019) [2] |
|                                  |                                 | Reverse | CGCCAAGACACCTCCAACATG         |                               |
| Glutathione S-Transferase        | <i>OsGSTL3</i>                  | Foward  | CAAGATGAAGCAGGCAGAG           | Zhang et al. (2014)<br>[3]    |
| 18S ribosomal RNA                | <i>Os18S</i>                    | Reverse | GCACACCAACACCAACTT            | Jain et al. (2006) [4]        |
|                                  |                                 | Foward  | CTACGTCCCTGCCCTTTGTACA        |                               |
| Elongation Factor 1- $\alpha$    | <i>OsEF1<math>\alpha</math></i> | Reverse | ACACTTCACCGGACCATTCAA         | Jain et al. (2006) [4]        |
|                                  |                                 | Foward  | TTTCACTCTTGGTGTGAAGCAGAT      |                               |
| Ubiquitin 5                      | <i>OsUBQ5</i>                   | Reverse | GACTTCCTTCACGATTCATCG-<br>TAA | Jain et al. (2006)[4]         |
|                                  |                                 | Foward  | ACCACTTCGACCGCCACTACT         |                               |
|                                  |                                 | Reverse | ACGCCTAAGCCTGCTGGTT           |                               |

**Table S3.** Yield components and analysis of deviance type II Wald chi-square test of rice as affected by planting time (two seasons 2019/2020; 30/September, 25/October and 11/November; and 2020/2021; and 25/September 20/October 10/November), spraying time (V<sub>2</sub>, V<sub>6</sub>, and R<sub>0</sub>) and florypyrauxifen-benzyl rates (0, 30 and 60 g ai ha<sup>-1</sup>).

| Treatments          | Tiller Number           | Number of<br>Grains per<br>Panicle <sup>1</sup> | 1000 Grain<br>Mass (g) | Unfilled<br>Grains Panicle<br><sub>1</sub> | Grain Yield<br>(kg ha <sup>-1</sup> ) | Spikelet Ste-<br>rility (%) |
|---------------------|-------------------------|-------------------------------------------------|------------------------|--------------------------------------------|---------------------------------------|-----------------------------|
| V <sub>2</sub> x 0  | 4.7 <sup>ns</sup>       | 106.0 <sup>ns</sup>                             | 26.5 <sup>ns</sup>     | 11.8 <sup>ns</sup>                         | 8635.0 <sup>ns</sup>                  | 10.9 <sup>ns</sup>          |
| V <sub>2</sub> x 30 | 5.7                     | 104.1                                           | 26.2                   | 12.5                                       | 8220.0                                | 11.3                        |
| V <sub>2</sub> x 60 | 5.0                     | 110.8                                           | 26.2                   | 13.3                                       | 8582.0                                | 12.3                        |
| V <sub>6</sub> x 0  | 5.0                     | 103.3                                           | 26.0                   | 12.4                                       | 8406.0                                | 11.4                        |
| V <sub>6</sub> x 30 | 5.7                     | 106.5                                           | 26.5                   | 12.1                                       | 8277.0                                | 11.4                        |
| V <sub>6</sub> x 60 | 5.7                     | 103.3                                           | 26.7                   | 10.4                                       | 8227.0                                | 9.7                         |
| R <sub>0</sub> x 0  | 5.9                     | 102.8                                           | 26.2                   | 11.3                                       | 8356.0                                | 10.4                        |
| R <sub>0</sub> x 30 | 4.8                     | 106.5                                           | 26.4                   | 12.0                                       | 8746.0                                | 11.1                        |
| R <sub>0</sub> x 60 | 5.3                     | 104.9                                           | 26.4                   | 11.3                                       | 8145.0                                | 10.8                        |
| Factor              | Pr(>Chisq) <sup>1</sup> |                                                 |                        |                                            |                                       |                             |
| Block               | 0.1800                  | 0.1458                                          | 0.1254                 | 0.1499                                     | 0.0452                                | 0.1345                      |
| Planting time (PT)  | 0.3134                  | 0.2185                                          | 0.2549                 | 0.5756                                     | 0.2518                                | 0.3517                      |
| Spraying time (ST)  | 0.5818                  | 0.6454                                          | 0.8780                 | 0.4770                                     | 0.7302                                | 0.5597                      |
| Rate                | 0.8522                  | 0.7281                                          | 0.6305                 | 0.8324                                     | 0.7989                                | 0.8738                      |
| PT x ST             | 0.5238                  | 0.6427                                          | 0.5596                 | 0.3530                                     | 0.2946                                | 0.3639                      |
| PT x Rate           | 0.1067                  | 0.2724                                          | 0.3856                 | 0.8304                                     | 0.5863                                | 0.8701                      |
| ST x Rate           | 0.1230                  | 0.6984                                          | 0.2879                 | 0.6109                                     | 0.4621                                | 0.5237                      |
| PT x ST x Rate      | 0.7983                  | 0.6513                                          | 0.5344                 | 0.9932                                     | 0.7485                                | 0.9852                      |

<sup>ns</sup>: non-significant. <sup>1</sup> Analysis of deviance type II Wald chi-square test.

**Table S4.** Parameters estimate of the dose response curve of rice plant injury evaluated at three, seven, 14, 21 and 28 days after florypyrauxifen-benzyl treatment as affected by P450 inhibitors applied one hour before for malathion and Piperonyl butoxide, and at seed treatment for dietholate.

| Treatments                     | B <sup>2</sup> | SE <sup>3</sup> | Rice Plant In-<br>jury (%) |        | ED <sub>50</sub> <sup>5</sup> | CI 95%        | Inhibition<br>Ratio (%) <sup>6</sup> | <i>p</i> -Value <sup>7</sup> |
|--------------------------------|----------------|-----------------|----------------------------|--------|-------------------------------|---------------|--------------------------------------|------------------------------|
|                                |                |                 | D <sup>4</sup>             | SE     |                               |               |                                      |                              |
| 3 DAA <sup>1</sup>             |                |                 |                            |        |                               |               |                                      |                              |
| Check without inhibitor        | -1.1           | (0.8)           | 38.8                       | (30.0) | 285.2                         | (0-651.1)     | 0.0                                  |                              |
| Malathion                      | -3.8           | (0.9)           | 40.7                       | (1.7)  | 111.4                         | (105.9-105.9) | 60.9                                 | 0.238                        |
| Dietholate fb PBO <sup>8</sup> | -1.9           | (0.5)           | 49.4                       | (3.1)  | 64.4                          | (56.9-71.8)   | 77.4                                 | 0.556                        |
| 7 DAA                          |                |                 |                            |        |                               |               |                                      |                              |
| Check without inhibitor        | -2.0           | (1.2)           | 64.5                       | (9.4)  | 119.6                         | (89.7-149.6)  | 0.0                                  |                              |
| Malathion                      | -4.4           | (0.5)           | 81.9                       | (1.6)  | 109.5                         | (107.3-111.8) | 8.4                                  | 0.684                        |
| Dietholate fb PBO              | -4.9           | (1.1)           | 84.5                       | (2.3)  | 82.6                          | (80.3-85.0)   | 30.9                                 | 0.172                        |
| 14 DAA                         |                |                 |                            |        |                               |               |                                      |                              |
| Check without inhibitor        | -1.2           | (0.4)           | 83.5                       | (24.4) | 252.0                         | (87.8-416.1)  | 0.0                                  |                              |
| Malathion                      | -2.8           | (0.3)           | 88.8                       | (2.3)  | 134.2                         | (128.5-140.0) | 46.7                                 | 0.079                        |
| Dietholate fb PBO              | -4.3           | (0.8)           | 87.3                       | (2.3)  | 88.3                          | (86.0-90.7)   | 64.9                                 | 0.189                        |
| 21 DAA                         |                |                 |                            |        |                               |               |                                      |                              |
| Check without inhibitor        | -4.7           | (2.0)           | 56.4                       | (3.2)  | 116.5                         | (108.2-124.9) | 0.0                                  |                              |
| Malathion                      | -2.5           | (0.3)           | 87.9                       | (2.6)  | 148.2                         | (140.4-155.9) | 0.0                                  | 0.051                        |
| Dietholate fb PBO              | -3.5           | (0.8)           | 88.5                       | (2.5)  | 88.2                          | (85.9-91.0)   | 24.3                                 | 0.000                        |
| 28 DAA                         |                |                 |                            |        |                               |               |                                      |                              |
| Check without inhibitor        | -1.6           | (0.5)           | 80.9                       | (8.5)  | 139.4                         | (110.7-168.1) | 0.0                                  |                              |
| Malathion                      | -2.8           | (0.3)           | 91.6                       | (2.2)  | 120.4                         | (115.9-124.8) | 13.6                                 | 0.461                        |
| Dietholate fb PBO              | -2.3           | (0.4)           | 92.4                       | (3.0)  | 84.6                          | (80.7-88.4)   | 39.3                                 | 0.062                        |

<sup>1</sup> Abbreviation: DAA, days after application. <sup>2</sup> Slope around ED<sub>50</sub>. <sup>3</sup> SE: stand error. <sup>4</sup> Upper limit for all plants. <sup>5</sup> Doses of florypyrauxifen-benzyl (g a.i. ha<sup>-1</sup>) causes 50% of crop injury. <sup>6</sup> (ED<sub>50</sub> check without inhibitor – ED<sub>50</sub> inhibition treatment) / ED<sub>50</sub> check without inhibitor \*100. <sup>7</sup> Florypyrauxifen-benzyl vs. inhibition treatment fb florypyrauxifen-benzyl on rice crop injury t-statics comparison of ED<sub>50</sub>. *p-value* > 0.05 means non-significant difference between treatments. <sup>8</sup> Piperonyl butoxide.

**Table S5.** Best Linear Unbiased Predictor BLUP's of runs for rice injury in the growth chamber experiment.

| Run  | Conditional Variances |       |       |       |       |
|------|-----------------------|-------|-------|-------|-------|
|      | 3DAA <sup>1</sup>     | 7DAA  | 14DAA | 21DAA | 28DAA |
| 2019 | -2.00                 | -0.49 | 0.00  | 0.00  | 0.98  |
| 2020 | 2.00                  | 0.49  | 0.00  | 0.00  | -0.98 |

<sup>1</sup> DDA, days after application.

## References

- Hirose, S.; Kawahigashi, H.; Tagiri, A.; Imaishi, H.; Ohkawa, H.; Ohkawa, Y. Tissue-specific expression of rice CYP72A21 induced by auxins and herbicides. *Plant Biotechnol. Rep.* 2007, 1, 27–36. <https://doi.org/10.1007/s11816-006-0003-2>.
- Malukani, K.K.; Ranjan, A.; Jyothi, H.S.; Patel, H.K.; Sonti, R.V. The dual function receptor kinase, OsWAKL21.2, is involved in elaboration of lipaseA/esterase induced immune responses in rice. *bioRxiv Prepr.* 2019.
- Zhang, J.J.; Chen, L.Y.; Zhang, J.J.; Rong, T.L.; Yang, H. Accumulation and toxicological response of atrazine in rice crops. *Eco-toxicol. Environ. Saf.* 2014, 102, 105–112. <https://doi.org/10.1016/j.ecoenv.2013.12.034>.
- Jain, M.; Nijhawan, A.; Tyagi, A.K.; Khurana, J.P. Validation of housekeeping genes as internal control for studying gene expression in rice by quantitative real-time PCR. *Biochem. Biophys. Res. Commun.* 2006, 345, 646–651. <https://doi.org/10.1016/j.bbrc.2006.04.140>.
